# Supplementary material for: Lysin and Lytic Phages Reduce Vibrio Counts in Live Feed and Fish Larvae
Source: MDPI journal article supplement (doi:10.3390/microorganisms12050904), 2024-04-30
Supplement: s1 [file s1]

# Lysin and lytic phage reduce vibrio counts in live feed and fish larvae

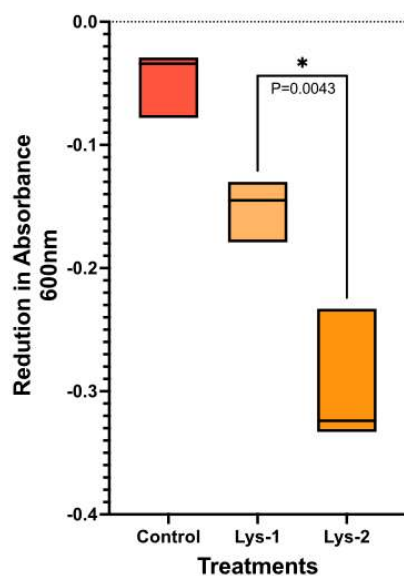

**Figure S1.** Lytic activity of Lysin (Lys) against *Vibrio* strain VPAP23 using 1mg/mL /Lys-1) or 2mg/mL (Lys-2)

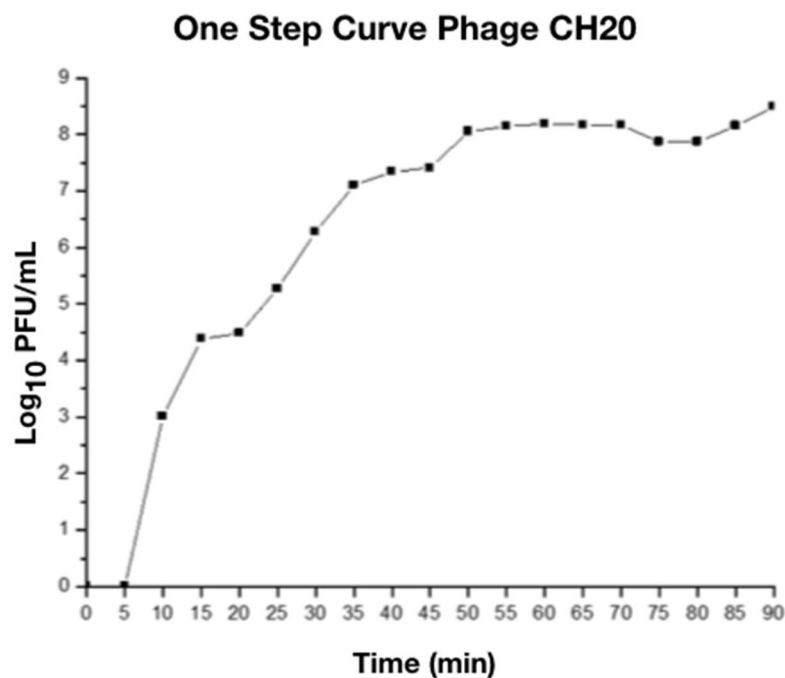

**Figure S2.** One step curve of phage CH20.

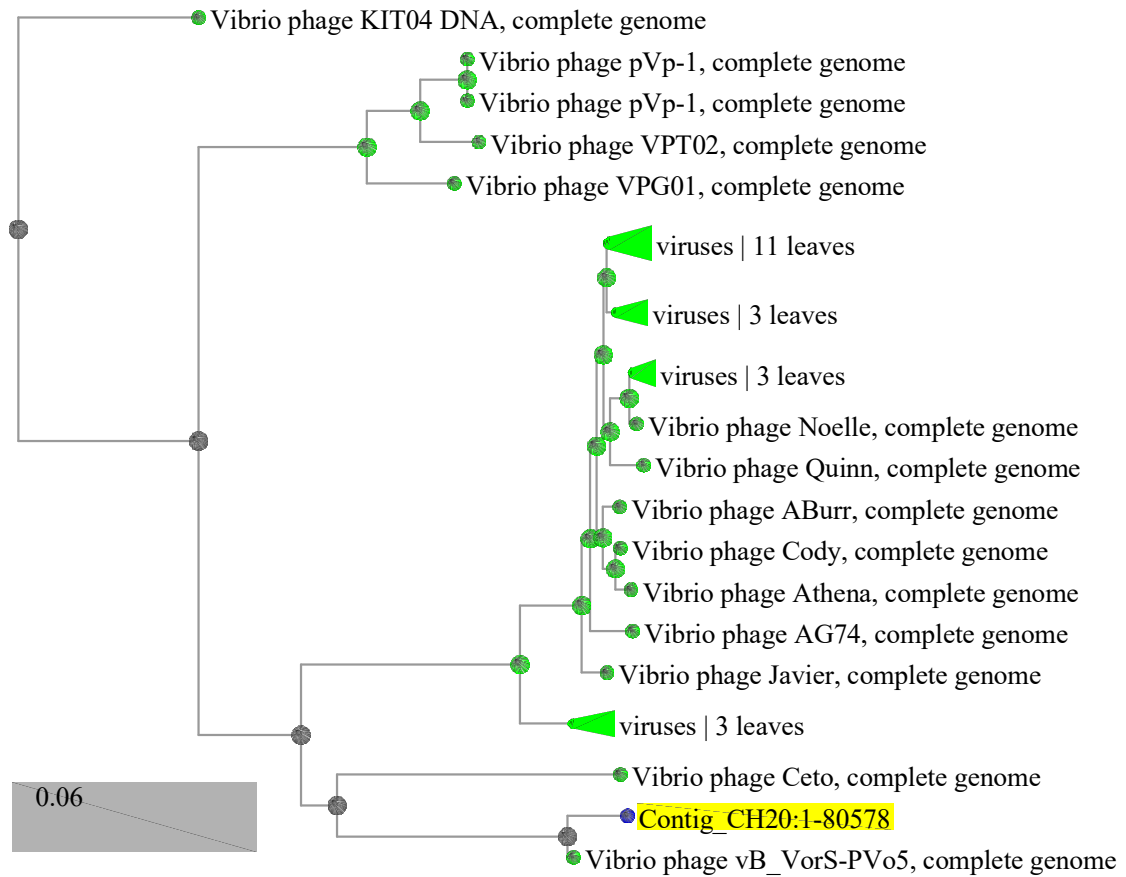

**Figure S3.** Tree generated by BLAST using the Fast Minimum Evolution method.

**Table S1.** Partial Characterization of Phage CH20.

| CH20       | Property                |
|------------|-------------------------|
| Source     | mussel                  |
| Genome     | DNA                     |
| Morphology | Siphoviridae            |
| Host range | GV09                    |
| Latency    | 10 min                  |
| Burst size | 42 virions per bacteria |
